# Supplementary material for: Association Between Ambient Air Pollution and Daily Hospital Admissions for Depression in 75 Chinese Cities
Source: Atypon-hosted journal article supplement (doi:10.1176/appi.ajp.2020.19070748), 2020-04-21
Supplement: appi.ajp.2020.19070748.ds001.pdf [file appi.ajp.2020.19070748.ds001.pdf]

## CONTENTS

**Table S1.** Number of monitoring sites in 75 Chinese cities.

**Table S2.** Spearman correlation coefficients among the ambient air pollutants and weather variables in 75 Chinese cities during 2013-2017.

**Table S3.** Metaregression results of city-specific variables for the significant associations between ambient air pollutants and daily hospital admissions for depression.

**Table S4.** Associations between ambient air pollutants and daily hospital admissions for depression in two-pollutant models.

**Figure S1.** Locations of the 75 Chinese cities included in this study.

**Figure S2.** Monthly variation of daily concentrations of ambient PM<sub>2.5</sub>, PM<sub>10</sub>, NO<sub>2</sub>, SO<sub>2</sub>, O<sub>3</sub>, CO and number of hospital admissions for depression in 75 Chinese cities during the study period (2013-2017)

**Figure S3.** Forest plots for overall analyses of daily hospital admission for depression associated with an increase of 10 µg/m<sup>3</sup> in PM<sub>2.5</sub> at lag01 in 75 Chinese cities. The size of the percent change data markers is relative to each city's weight.

**Figure S4.** Forest plots for overall analyses of daily hospital admission for depression associated with an increase of 10 µg/m<sup>3</sup> in PM<sub>10</sub> at lag01 in 75 Chinese cities. The size of the percent change data markers is relative to each city's weight.

**Figure S5.** Forest plots for overall analyses of daily hospital admission for depression associated with an increase of 10 µg/m<sup>3</sup> in NO<sub>2</sub> at lag01 in 75 Chinese cities. The size of the percent change data markers is relative to each city's weight.

**Figure S6.** Forest plots for overall analyses of daily hospital admission for depression associated with an increase of 10 µg/m<sup>3</sup> in SO<sub>2</sub> at lag01 in 75 Chinese cities. The size of the percent change data markers is relative to each city's weight.

**Figure S7.** Forest plots for overall analyses of daily hospital admission for depression associated with an increase of 10 µg/m<sup>3</sup> in O<sub>3</sub> at lag01 in 75 Chinese cities. The size of the percent change data markers is relative to each city's weight.

**Figure S8.** Forest plots for overall analyses of daily hospital admission for depression associated with an increase of  $1 \text{ mg/m}^3$  in CO at lag01 in 75 Chinese cities. The size of the percent change data markers is relative to each city's weight.

**Figure S9.** Overall percent changes in daily hospital admissions for depression per  $10\mu\text{g/m}^3$  increases in  $\text{PM}_{2.5}$ ,  $\text{PM}_{10}$ ,  $\text{NO}_2$ ,  $\text{SO}_2$ ,  $\text{O}_3$  and  $1\text{mg/m}^3$  increase in CO at different lag days in 75 Chinese cities stratified by geographical region.

**Figure S10.** Overall percent changes in daily hospital admissions for depression per  $10\mu\text{g/m}^3$  increases in  $\text{PM}_{2.5}$ ,  $\text{PM}_{10}$ ,  $\text{NO}_2$ ,  $\text{SO}_2$ ,  $\text{O}_3$  and  $1\text{mg/m}^3$  increase in CO at different lag days in 75 Chinese cities stratified by sex.

**Figure S11.** Overall percent changes in daily hospital admissions for depression per  $10\mu\text{g/m}^3$  increases in  $\text{PM}_{2.5}$ ,  $\text{PM}_{10}$ ,  $\text{NO}_2$ ,  $\text{SO}_2$ ,  $\text{O}_3$  and  $1\text{mg/m}^3$  increase in CO at different lag days in 75 Chinese cities stratified by age.

**Figure S12.** Overall percent changes in daily hospital admissions for depression per  $10\mu\text{g/m}^3$  increases in  $\text{PM}_{2.5}$ ,  $\text{PM}_{10}$ ,  $\text{NO}_2$ ,  $\text{SO}_2$ ,  $\text{O}_3$  and  $1\text{mg/m}^3$  increase in CO at different lag days in 75 Chinese cities stratified by insurance type.

**TABLE S1. Number of monitoring sites in 75 Chinese cities.**

| Northern cities | No. of monitoring sites | Southern cities | No. of monitoring sites |
|-----------------|-------------------------|-----------------|-------------------------|
| Aletai          | 2                       | Bazhong         | 8                       |
| Anshan          | 7                       | Binzhou         | 5                       |
| Anyang          | 6                       | Changde         | 8                       |
| Baoji           | 8                       | Changsha        | 10                      |
| Changji         | 3                       | Changzhou       | 9                       |
| Chengde         | 5                       | Chengdu         | 10                      |
| Datong          | 7                       | Chongqing       | 21                      |
| Dezhou          | 4                       | Chuxiong        | 2                       |
| Handan          | 4                       | Dazhou          | 5                       |
| Hebi            | 3                       | Enshi           | 2                       |
| Heze            | 3                       | Ganzi           | 3                       |
| Jilin           | 8                       | Guangzhou       | 12                      |
| Jinan           | 8                       | Hangzhou        | 11                      |
| Jining          | 3                       | Honghe          | 4                       |
| Jinzhou         | 5                       | Huaihua         | 5                       |
| Lanzhou         | 6                       | Jiaxing         | 6                       |
| Liaocheng       | 5                       | Jinhua          | 4                       |
| Qingyang        | 3                       | Lishui          | 3                       |
| Qiqihaer        | 5                       | Liuan           | 4                       |
| Shenyang        | 13                      | Nanchong        | 6                       |
| Siping          | 3                       | Puer            | 2                       |
| Tacheng         | 1                       | Qingyuan        | 4                       |
| Taian           | 3                       | Quzhou          | 3                       |
| Tangshan        | 6                       | Shantou         | 6                       |
| Tianjin         | 20                      | Shaotong        | 2                       |
| Weifang         | 8                       | Shaoyang        | 5                       |
| Weihai          | 3                       | Shiyan          | 4                       |
| Weinan          | 4                       | Taizhou         | 3                       |
| Wuhai           | 3                       | Tongling        | 6                       |
| Wulumuqi        | 8                       | Wuhan           | 11                      |
| Xianyang        | 4                       | Wuhu            | 4                       |
| Yanan           | 4                       | Wuxi            | 8                       |
| Yanbian         | 3                       | Xiangyang       | 5                       |
| Yantai          | 7                       | Yueyang         | 6                       |
| Yuncheng        | 6                       | Yuxi            | 5                       |
| Zaozhuang       | 5                       | Zhuzhou         | 7                       |
| Zhumadian       | 3                       | Zigong          | 6                       |
| Zibo            | 6                       |                 |                         |

**TABLE S2.** Spearman correlation coefficients among the ambient air pollutants and weather variables in 75 Chinese cities during 2013-2017.

|                   | <b>PM<sub>2.5</sub></b> | <b>PM<sub>10</sub></b> | <b>NO<sub>2</sub></b> | <b>SO<sub>2</sub></b> | <b>O<sub>3</sub></b> | <b>CO</b>           | <b>Temperature</b>  | <b>Relative humidity</b> |
|-------------------|-------------------------|------------------------|-----------------------|-----------------------|----------------------|---------------------|---------------------|--------------------------|
| PM <sub>2.5</sub> | 1·00                    | 0·88 <sup>††</sup>     | 0·67 <sup>††</sup>    | 0·58 <sup>††</sup>    | -0·06 <sup>††</sup>  | 0·06 <sup>††</sup>  | -0·27 <sup>††</sup> | <0·01                    |
| PM <sub>10</sub>  |                         | 1·00                   | 0·67 <sup>††</sup>    | 0·59 <sup>††</sup>    | -0·01 <sup>†</sup>   | 0·07 <sup>††</sup>  | -0·24 <sup>††</sup> | -0·16 <sup>††</sup>      |
| SO <sub>2</sub>   |                         |                        | 1·00                  | 0·57 <sup>††</sup>    | -0·10 <sup>††</sup>  | 0·07 <sup>††</sup>  | -0·38 <sup>††</sup> | -0·24 <sup>††</sup>      |
| NO <sub>2</sub>   |                         |                        |                       | 1·00                  | -0·06 <sup>††</sup>  | 0·06 <sup>††</sup>  | -0·26 <sup>††</sup> | -0·08 <sup>††</sup>      |
| O <sub>3</sub>    |                         |                        |                       |                       | 1·00                 | -0·01 <sup>††</sup> | 0·45 <sup>††</sup>  | -0·14 <sup>††</sup>      |
| CO                |                         |                        |                       |                       |                      | 1·00                | -0·04 <sup>††</sup> | -0·02 <sup>††</sup>      |
| Temperature       |                         |                        |                       |                       |                      |                     | 1·00                | 0·21 <sup>††</sup>       |
| Relative humidity |                         |                        |                       |                       |                      |                     |                     | 1·00                     |

<sup>†</sup> $P < 0.05$ , <sup>††</sup> $P < 0.01$ .

**TABLE S3.** Metaregression results of city-specific variables for the significant associations between ambient air pollutants and daily hospital admissions for depression.

|                                          | Mean air pollutant concentration* |              | Temperature (°C) |             | Relative humidity (%) |             | GDP per capita |               |
|------------------------------------------|-----------------------------------|--------------|------------------|-------------|-----------------------|-------------|----------------|---------------|
|                                          | Percent Change                    | 95% CI       | Percent Change   | 95% CI      | Percent Change        | 95% CI      | Percent Change | 95% CI        |
| PM <sub>2.5</sub> (10µg/m <sup>3</sup> ) |                                   |              |                  |             |                       |             |                |               |
| lag1                                     | 0.02                              | -0.19, 0.22  | -0.05            | -0.17, 0.08 | 0.03                  | -0.04, 0.10 | -0.03          | -1.24, 1.20   |
| lag01                                    | -0.13                             | -0.40, 0.13  | -0.01            | -0.17, 0.15 | 0.03                  | -0.06, 0.11 | -0.47          | -1.98, 1.06   |
| lag02                                    | -0.04                             | -0.33, 0.25  | -0.07            | -0.24, 0.10 | 0.05                  | -0.05, 0.14 | -0.31          | -1.94, 1.34   |
| PM <sub>10</sub> (10µg/m <sup>3</sup> )  |                                   |              |                  |             |                       |             |                |               |
| lag1                                     | 0.01                              | -0.06, 0.07  | -0.02            | -0.12, 0.08 | 0.02                  | -0.03, 0.07 | -0.02          | -0.92, 0.89   |
| lag01                                    | -0.03                             | -0.12, 0.06  | -0.01            | -0.14, 0.12 | 0.03                  | -0.03, 0.09 | -0.31          | -1.49, 0.87   |
| lag02                                    | -0.01                             | -0.11, 0.09  | -0.03            | -0.17, 0.11 | 0.03                  | -0.04, 0.10 | -0.29          | -1.56, 1.00   |
| lag03                                    | 0.00                              | -0.12, 0.13  | -0.03            | -0.19, 0.14 | 0.00                  | -0.08, 0.09 | -0.07          | -1.58, 1.47   |
| NO <sub>2</sub> (10µg/m <sup>3</sup> )   |                                   |              |                  |             |                       |             |                |               |
| lag0                                     | -0.24†                            | -0.48, -0.00 | -0.09            | -0.37, 0.19 | 0.06                  | -0.07, 0.20 | -1.87          | -4.04, 0.35   |
| lag1                                     | -0.02                             | -0.47, 0.42  | 0.17             | -0.18, 0.53 | 0.02                  | -0.15, 0.19 | -1.74          | -4.60, 1.21   |
| lag01                                    | -0.17                             | -0.54, 0.19  | 0.03             | -0.32, 0.39 | 0.05                  | -0.13, 0.22 | -2.40          | -5.15, 0.43   |
| lag02                                    | -0.11                             | -0.58, 0.37  | 0.05             | -0.38, 0.48 | 0.10                  | -0.11, 0.31 | -2.93          | -6.24, 0.50   |
| lag03                                    | -0.10                             | -0.75, 0.56  | 0.02             | -0.51, 0.55 | 0.10                  | -0.16, 0.36 | -2.70          | -6.81, 1.59   |
| lag04                                    | -0.10                             | -0.99, 0.79  | 0.07             | -0.58, 0.73 | 0.08                  | -0.24, 0.39 | -1.87          | -7.01, 3.55   |
| SO <sub>2</sub> (10µg/m <sup>3</sup> )   |                                   |              |                  |             |                       |             |                |               |
| lag0                                     | -0.07                             | -0.53, 0.39  | 0.03             | -0.35, 0.41 | 0.09                  | -0.06, 0.25 | -1.04          | -4.65, 2.70   |
| O <sub>3</sub> (10µg/m <sup>3</sup> )**  |                                   |              |                  |             |                       |             |                |               |
| -                                        | -                                 |              | -                |             | -                     |             | -              |               |
| CO (1mg/m <sup>3</sup> )                 |                                   |              |                  |             |                       |             |                |               |
| lag05                                    | -0.90                             | -4.05, 2.36  | -0.12            | -2.24, 2.05 | 0.37                  | -0.69, 1.43 | -2.54          | -20.22, 19.06 |
| lag06                                    | -0.88                             | -4.42, 2.80  | 0.58             | -1.76, 2.97 | 0.14                  | -1.02, 1.31 | -8.15          | -26.19, 14.32 |
| lag07                                    | -0.91                             | -4.38, 2.69  | 0.66             | -1.70, 3.08 | 0.11                  | -1.06, 1.30 | -9.93          | -27.85, 12.44 |

Data are shown as percent changes and 95% confidence intervals (CIs).

\*Mean air pollutant concentration indicated whether estimates of the association between one air pollutant and depression admissions were modified by the mean levels of the air pollutant.

\*\*We only examined the modification effect on the significant effect estimates of each air pollutant in the main analysis (Figure 2) and no estimate of O<sub>3</sub> was significant at  $P < 0.05$ .

† $P < 0.05$ .

**TABLE S4.** Associations between ambient air pollutants and daily hospital admissions for depression in two-pollutant models.

|                          | Adjusted for<br>PM <sub>2.5</sub> |             | Adjusted for<br>PM <sub>10</sub> |             | Adjusted for<br>NO <sub>2</sub> |             | Adjusted for<br>SO <sub>2</sub> |             | Adjusted for<br>O <sub>3</sub> |                   | Adjusted for<br>CO |             |
|--------------------------|-----------------------------------|-------------|----------------------------------|-------------|---------------------------------|-------------|---------------------------------|-------------|--------------------------------|-------------------|--------------------|-------------|
|                          | Percent<br>Change                 | 95%<br>CI   | Percent<br>Change                | 95%<br>CI   | Percent<br>Change               | 95%<br>CI   | Percent<br>Change               | 95%<br>CI   | Percent<br>Change              | 95%<br>CI         | Percent<br>Change  | 95%<br>CI   |
|                          | PM <sub>2.5</sub> (lag02)         | -           |                                  | -0.04       | -0.16, 0.08                     | 0.01        | -0.04, 0.07                     | 0.05        | -0.01, 0.11                    | 0.06 <sup>†</sup> | 0.00, 0.11         | 0.03        |
| PM <sub>10</sub> (lag02) | 0.07                              | -0.02, 0.17 | -                                |             | 0.02                            | -0.03, 0.06 | 0.04                            | -0.01, 0.09 | 0.05 <sup>†</sup>              | 0.01, 0.09        | 0.04               | -0.01, 0.08 |
| NO <sub>2</sub> (lag0)   | 1.49 <sup>††</sup>                | 0.53, 2.45  | 1.48 <sup>††</sup>               | 0.51, 2.46  | -                               |             | 1.31 <sup>††</sup>              | 0.37, 2.26  | 1.61 <sup>††</sup>             | 0.86, 2.37        | 1.29 <sup>††</sup> | 0.34, 2.25  |
| SO <sub>2</sub> (lag0)   | 0.04                              | -0.01, 0.09 | 0.02                             | -0.07, 0.12 | 0.20 <sup>†</sup>               | 0.01, 0.39  | -                               |             | 0.06                           | -0.01, 0.14       | 0.75 <sup>†</sup>  | 0.13, 1.37  |
| O <sub>3</sub> (lag0)    | 0.44                              | -0.02, 0.90 | 0.44                             | -0.02, 0.91 | 0.56 <sup>†</sup>               | 0.08, 1.05  | 0.44                            | -0.03, 0.91 | -                              |                   | 0.45               | -0.03, 0.93 |
| CO (lag07)               | 0.73 <sup>†</sup>                 | 0.03, 1.45  | 0.68                             | -0.05, 1.42 | 0.49                            | -0.21, 1.19 | 0.77 <sup>†</sup>               | 0.08, 1.47  | 0.76 <sup>†</sup>              | 0.14, 1.39        | -                  |             |

Two-pollutant models were conducted only for the most significant effect estimate of each air pollutant (with the smallest p value) by controlling for another air pollutant at the same lag time. Data are shown as percent changes and 95% confidence intervals (CIs).

<sup>†</sup> $P < 0.05$ , <sup>††</sup> $P < 0.01$ .

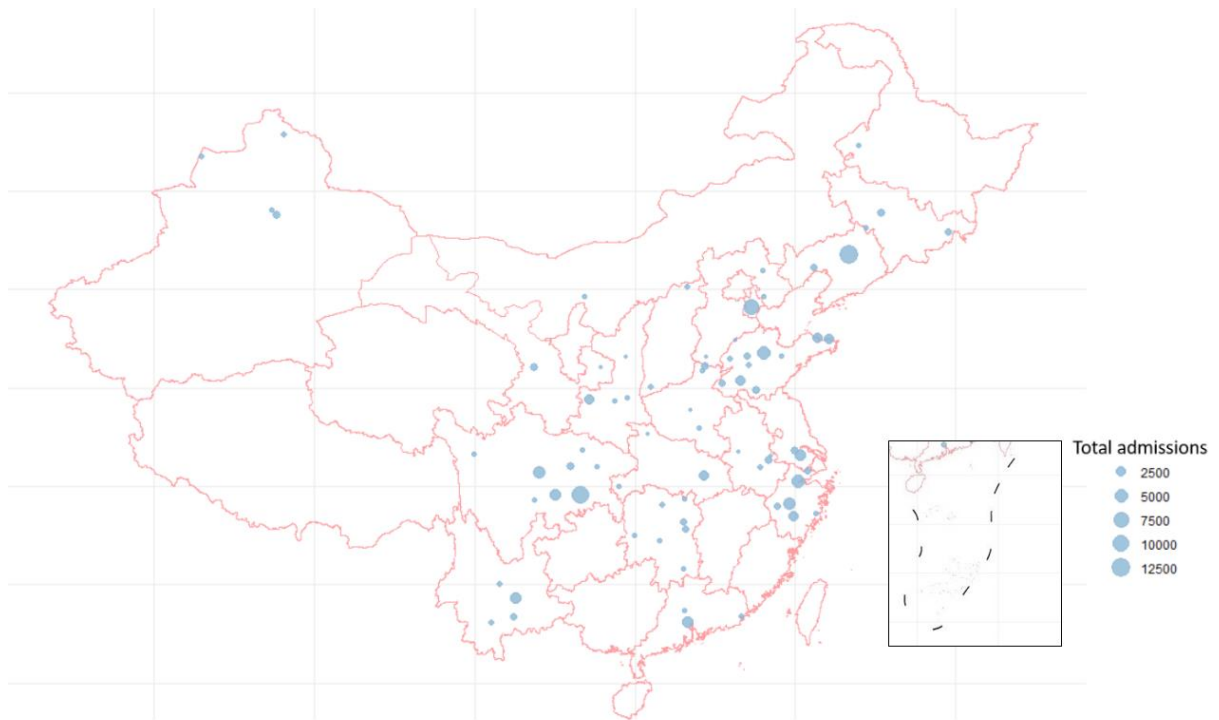

**FIGURE S1.** Locations of the 75 Chinese cities included in this study. Total admissions indicate the total number of hospital admissions for depression in each city during 2013-2017.

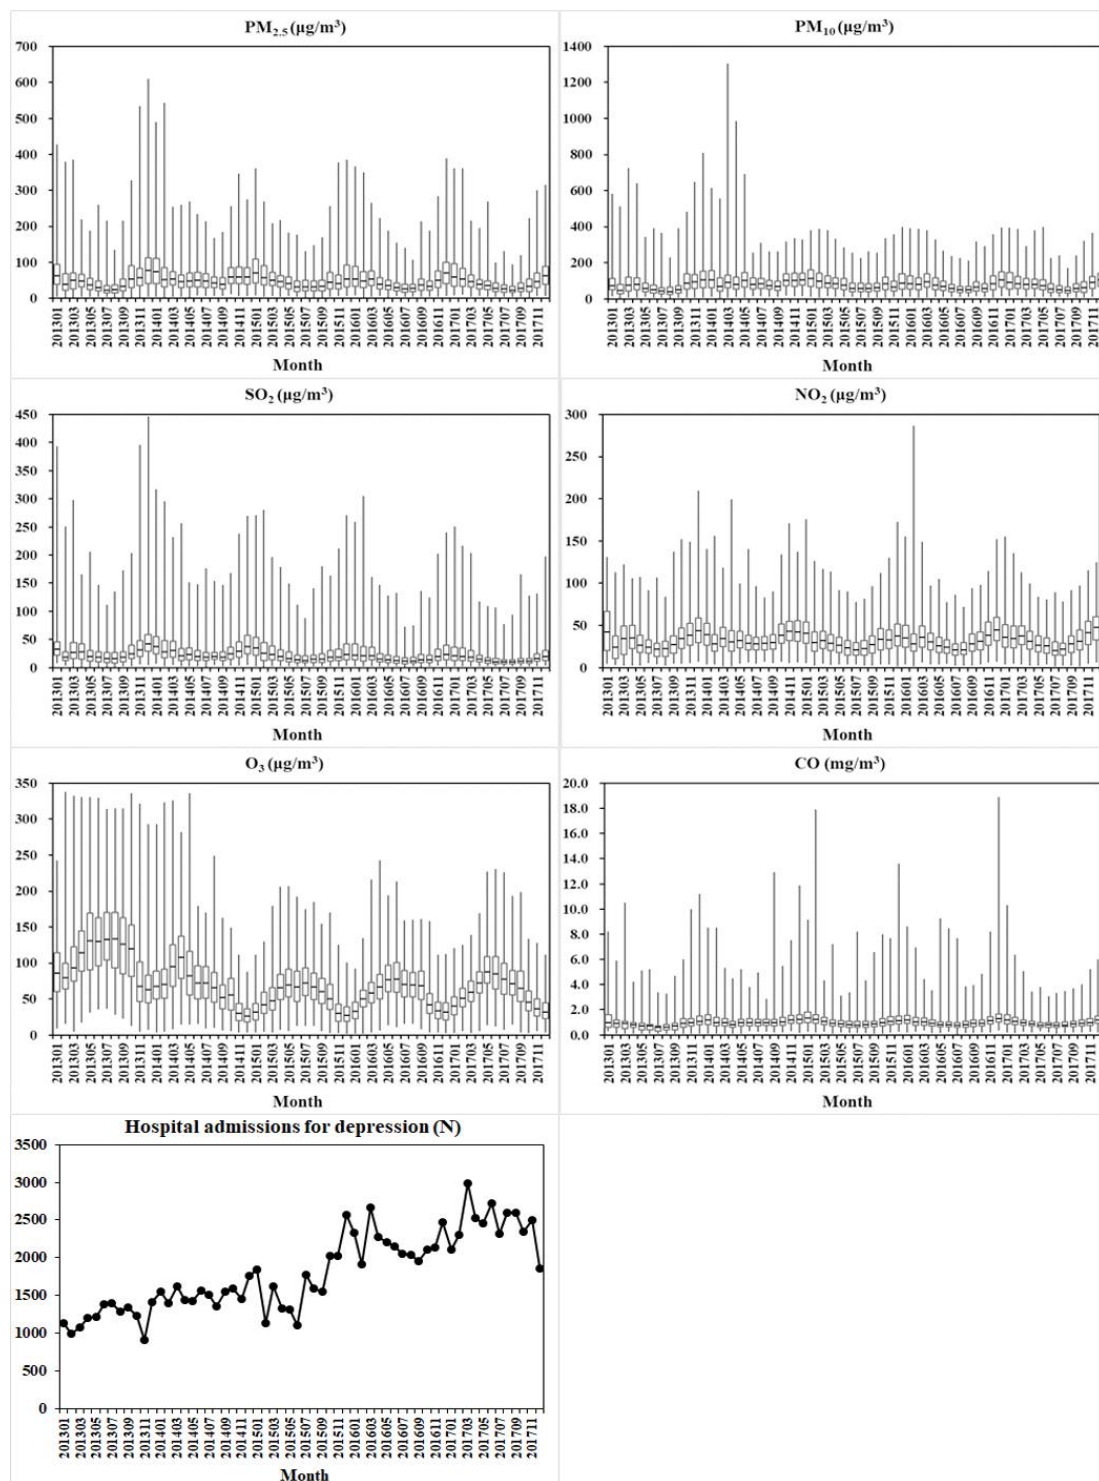

**FIGURE S2.** Monthly variation of daily concentrations of ambient PM<sub>2.5</sub>, PM<sub>10</sub>, NO<sub>2</sub>, SO<sub>2</sub>, O<sub>3</sub>, and CO and number of hospital admissions for depression in 75 Chinese cities during the study period (2013-2017). The lower and upper edges of the boxplot represent the 25<sup>th</sup> and 75<sup>th</sup> percentiles of the daily air pollutant concentrations, respectively, the horizontal line inside the boxplot indicates the median of the daily air pollutant concentrations, and the straight lines extending from the lower and upper edges of the boxplot connect the minimum and maximum values of the daily air pollutant concentrations.



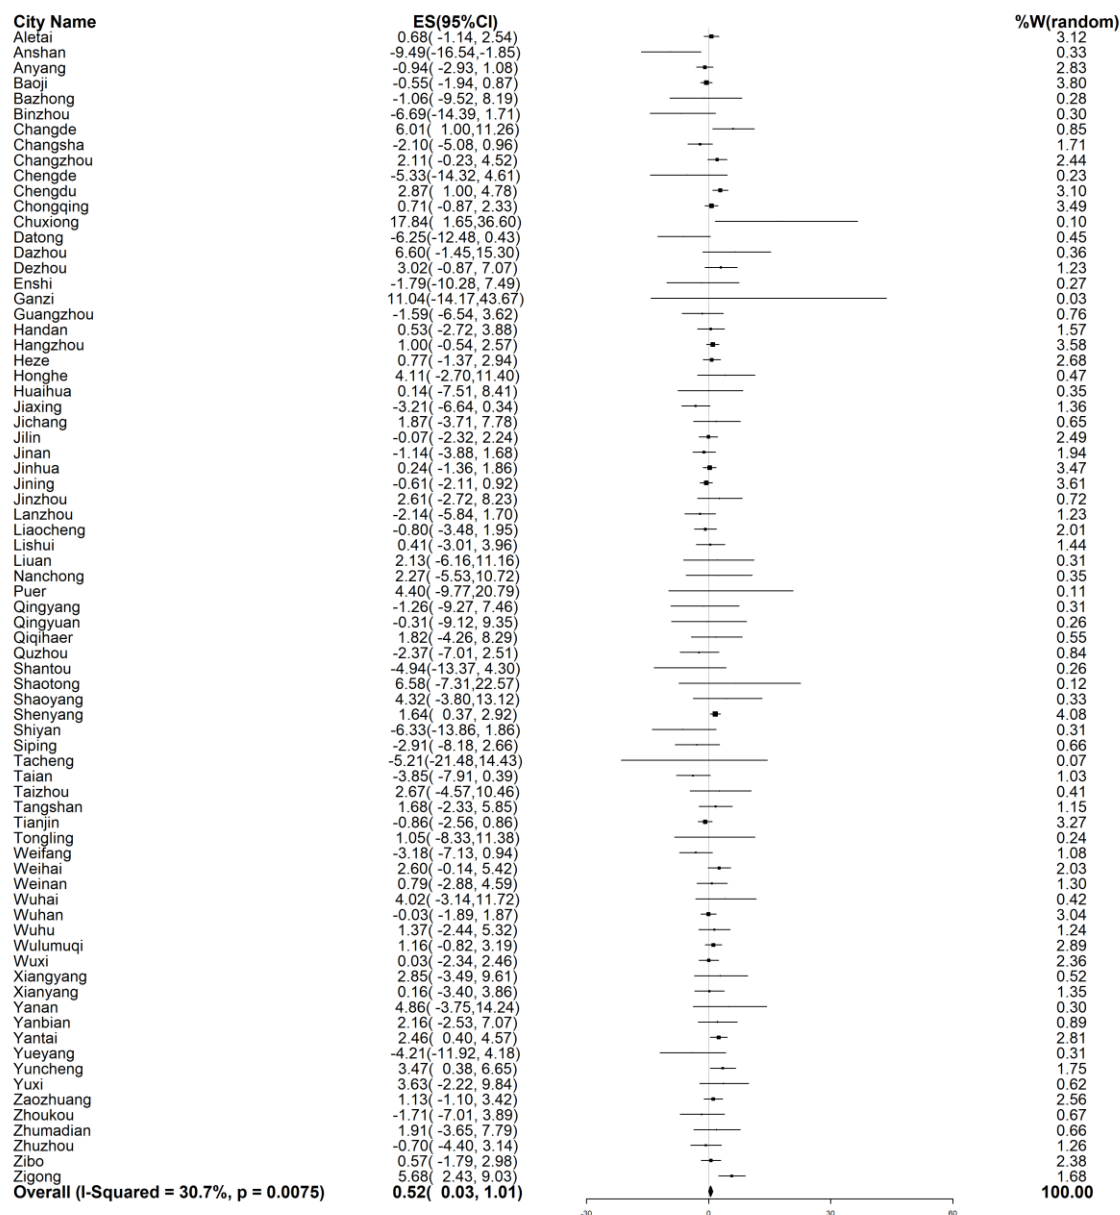

**FIGURE S3.** Forest plots for overall analyses of daily hospital admission for depression associated with an increase of  $10 \mu\text{g}/\text{m}^3$  in  $\text{PM}_{2.5}$  at lag01 in 75 Chinese cities. The size of the percent change data markers is relative to each city's weight.

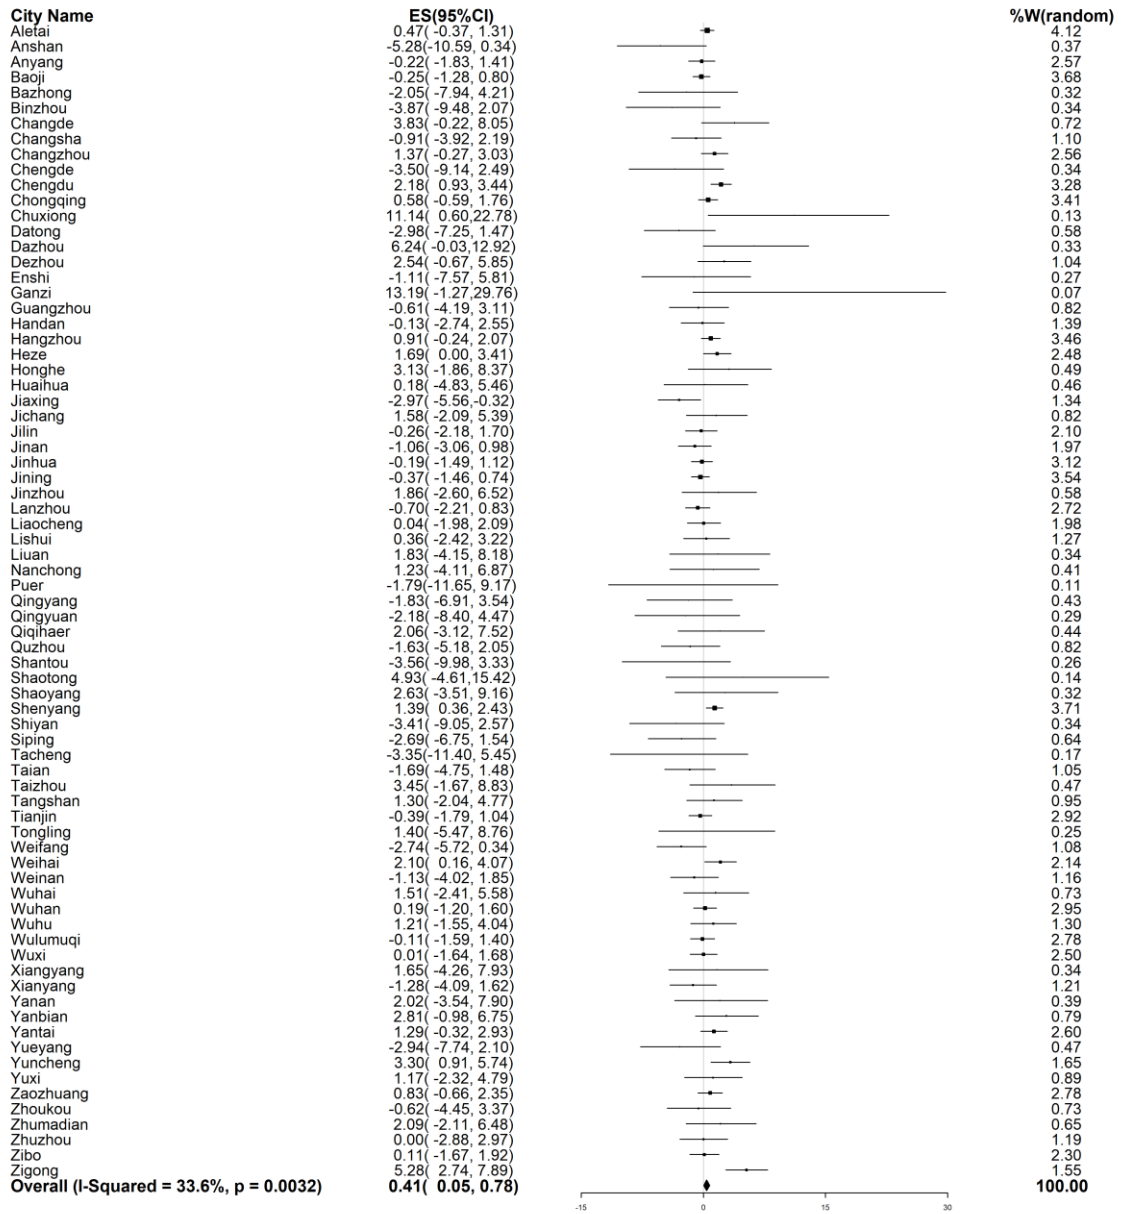

**FIGURE S4.** Forest plots for overall analyses of daily hospital admissions for depression associated with an increase of  $10 \mu\text{g}/\text{m}^3$  in  $\text{PM}_{10}$  at lag01 in 75 Chinese cities. The size of the percent change data markers is relative to each city's weight.

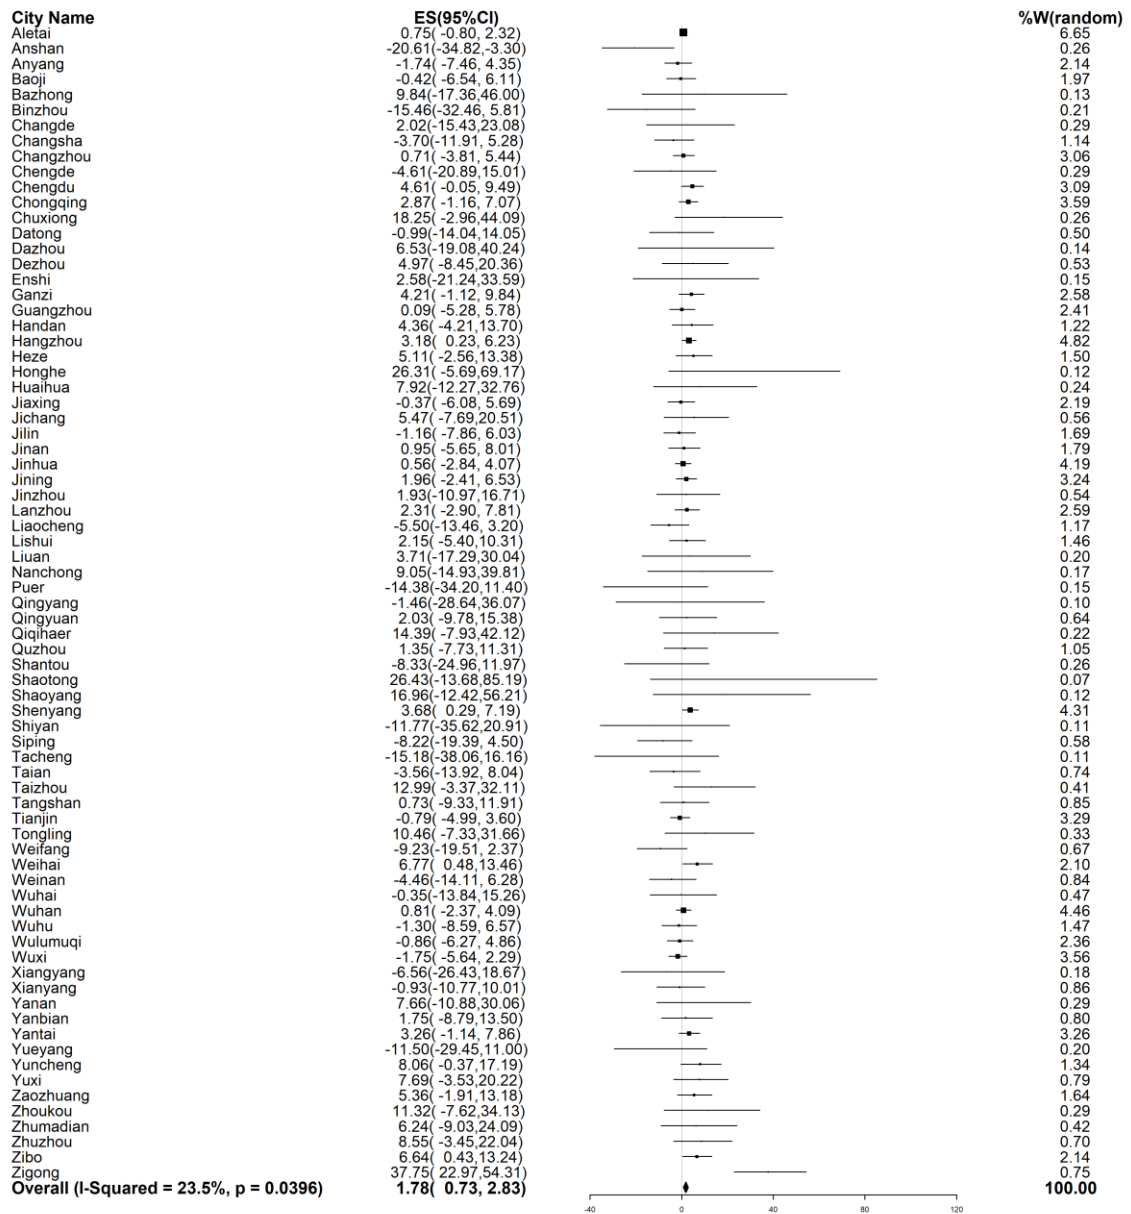

**FIGURE S5.** Forest plots for overall analyses of daily hospital admissions for depression associated with an increase of  $10 \mu\text{g}/\text{m}^3$  in  $\text{NO}_2$  at lag01 in 75 Chinese cities. The size of the percent change data markers is relative to each city's weight.

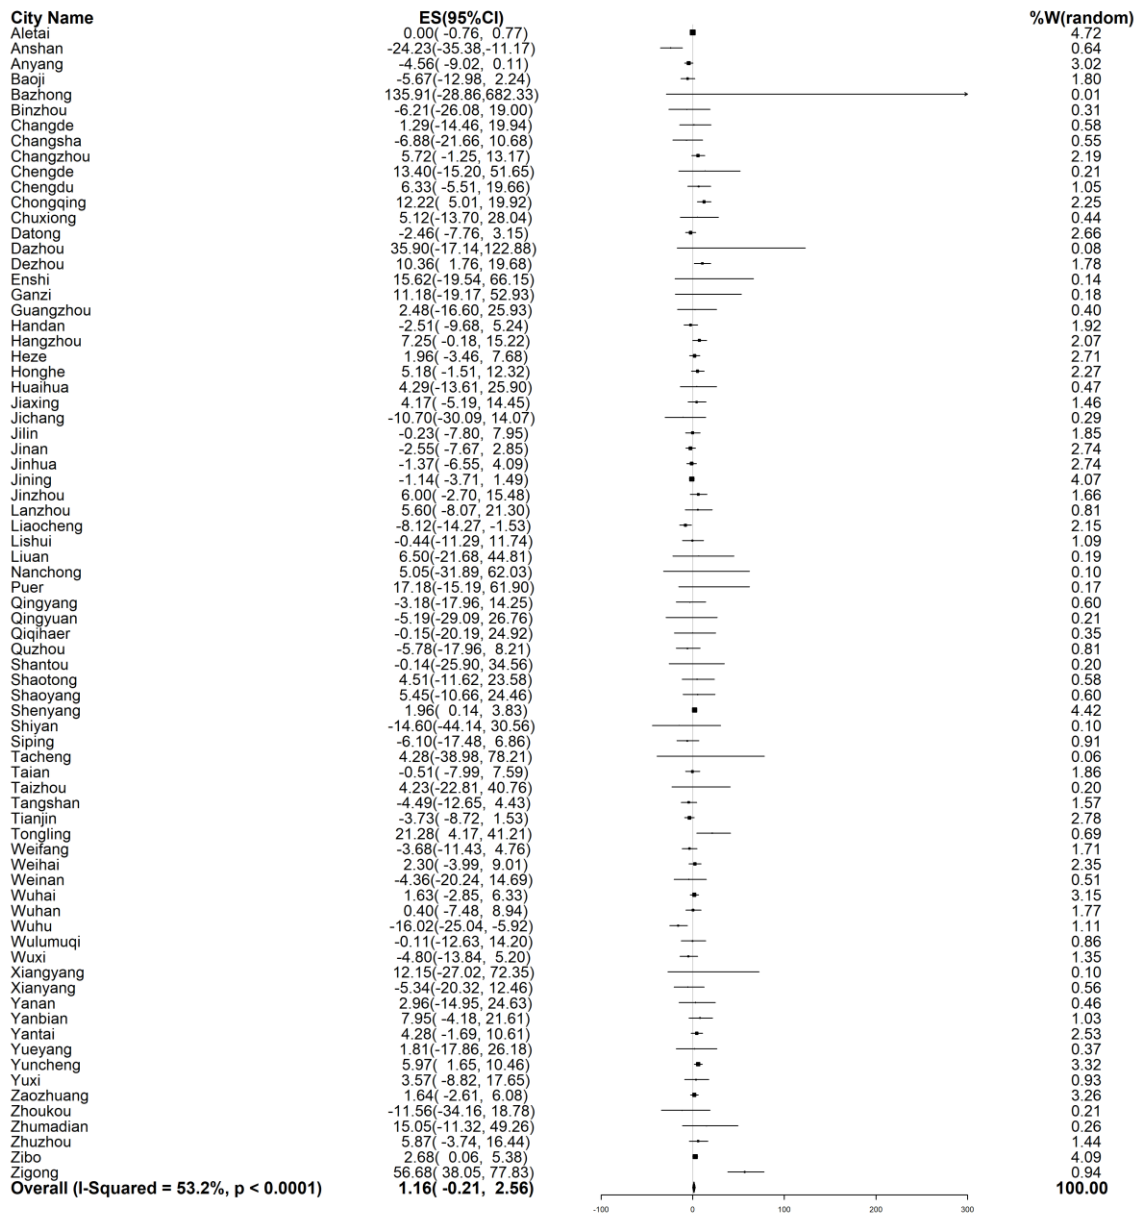

**FIGURE S6.** Forest plots for overall analyses of daily hospital admissions for depression associated with an increase of  $10 \mu\text{g}/\text{m}^3$  in  $\text{SO}_2$  at lag01 in 75 Chinese cities. The size of the percent change data markers is relative to each city's weight.

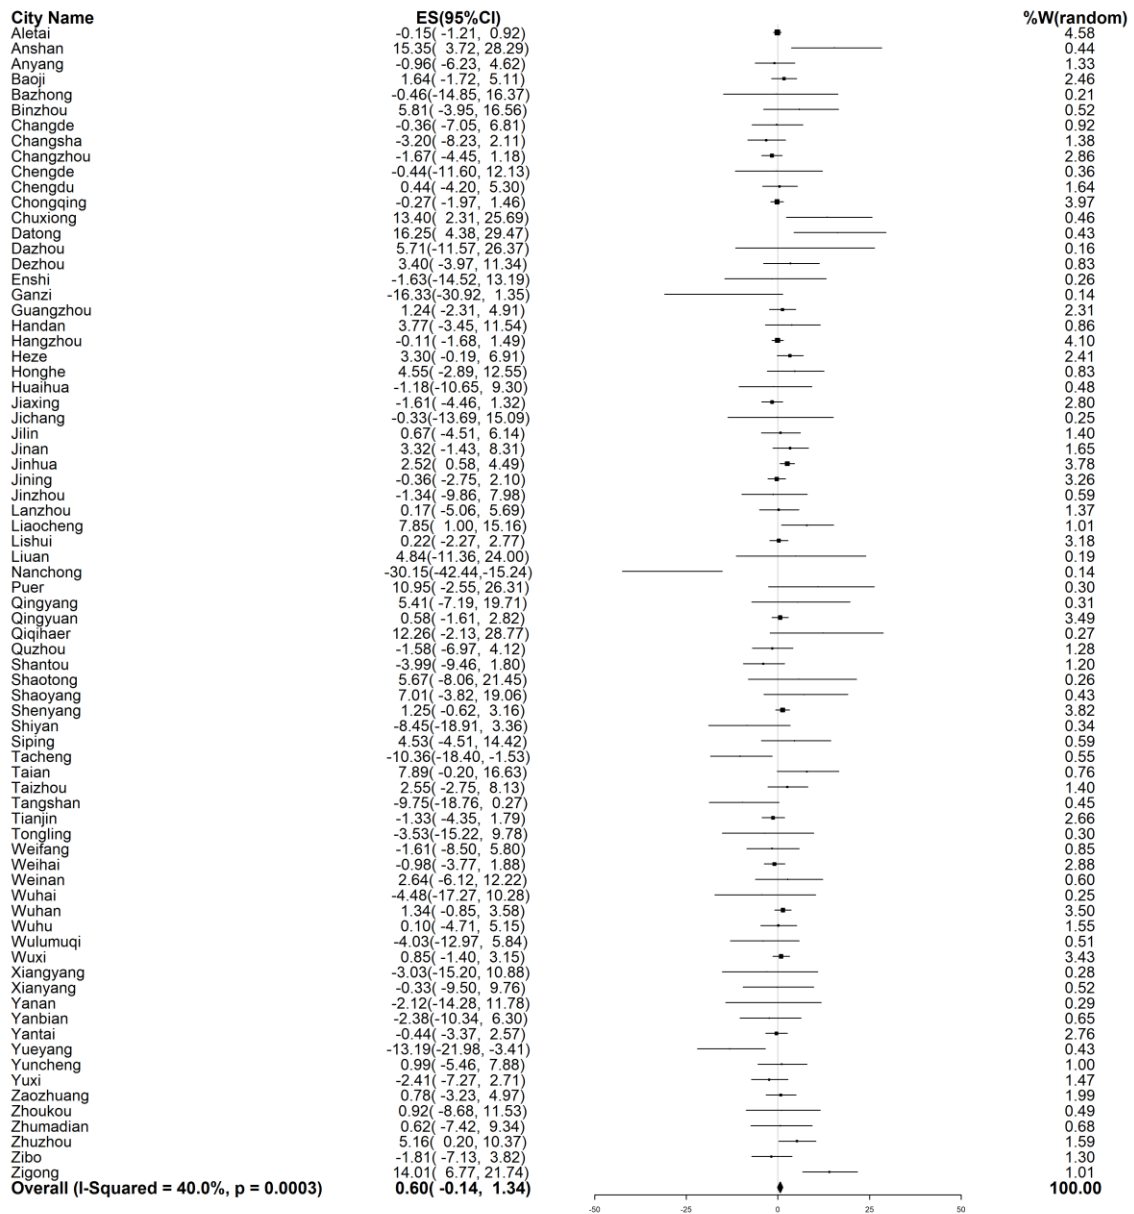

**FIGURE S7.** Forest plots for overall analyses of daily hospital admissions for depression associated with an increase of 10  $\mu\text{g}/\text{m}^3$  in  $\text{O}_3$  at lag01 in 75 Chinese cities. The size of the percent change data markers is relative to each city's weight.

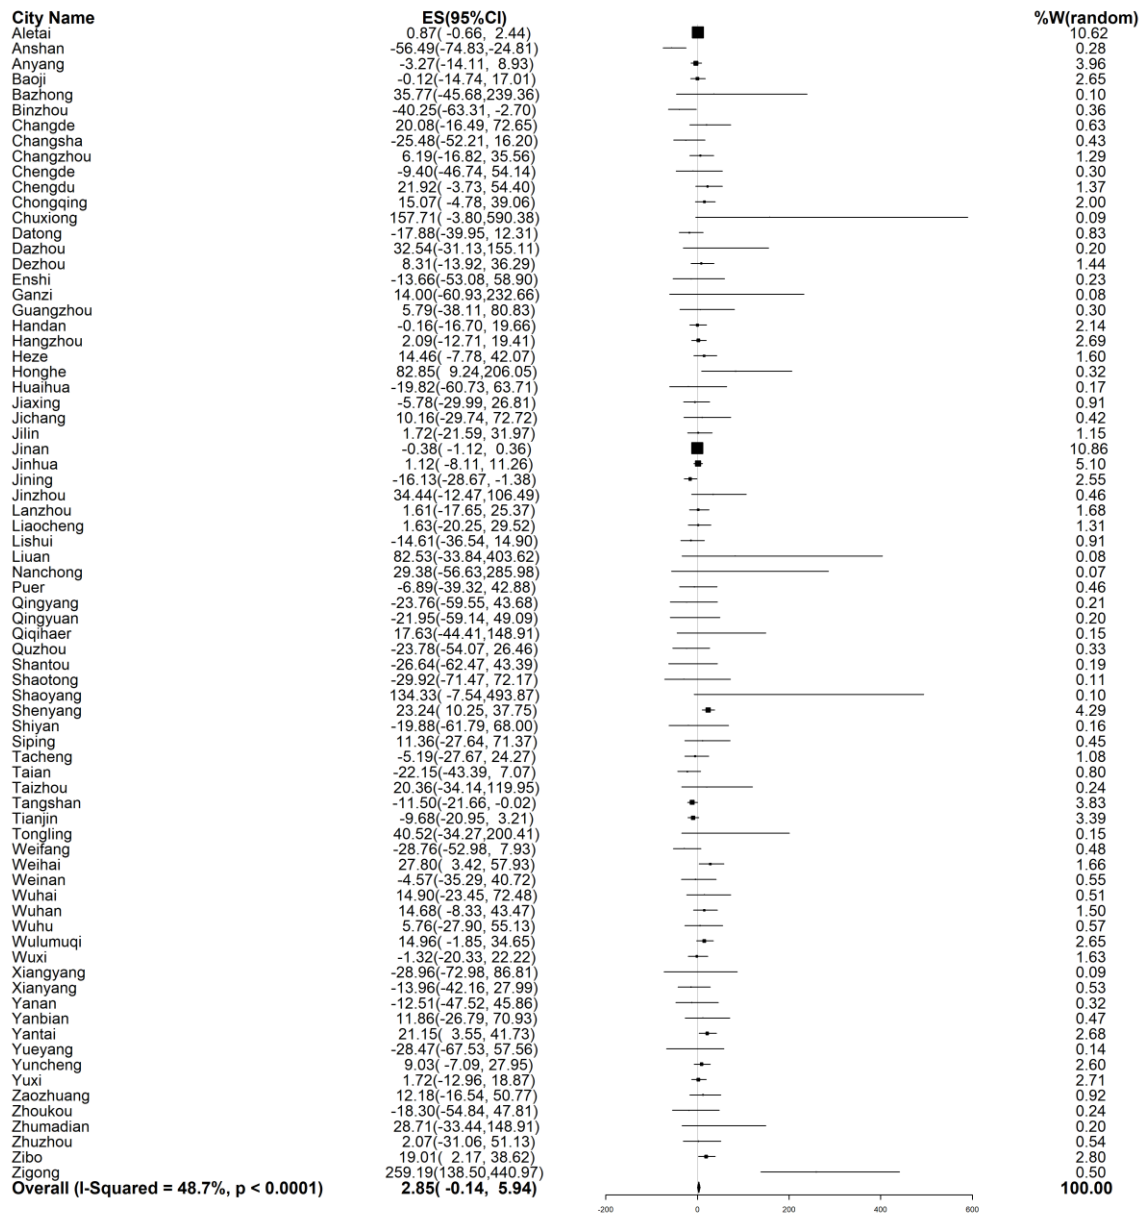

**FIGURE S8.** Forest plots for overall analyses of daily hospital admissions for depression associated with an increase of 1 mg/m<sup>3</sup> in CO at lag01 in 75 Chinese cities. The size of the percent change data markers is relative to each city's weight.

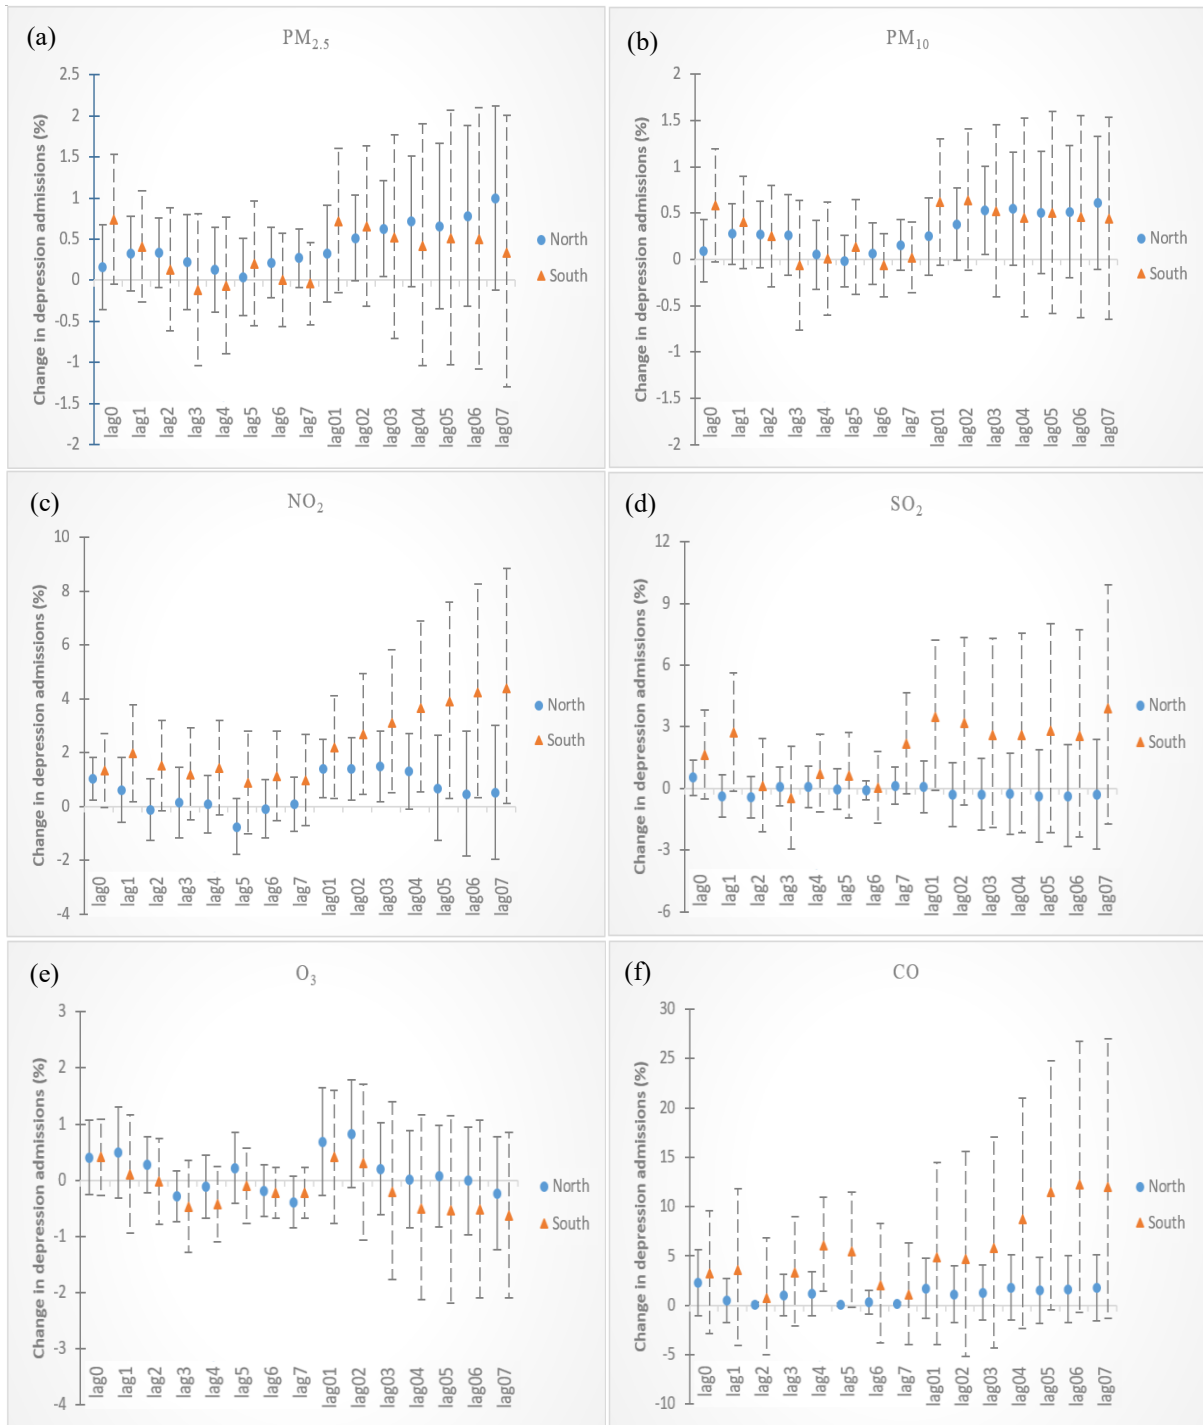

**FIGURE S9.** Overall percent changes in daily hospital admissions for depression per  $10\mu\text{g}/\text{m}^3$  increases in  $\text{PM}_{2.5}$ ,  $\text{PM}_{10}$ ,  $\text{NO}_2$ ,  $\text{SO}_2$ ,  $\text{O}_3$  and  $1\text{mg}/\text{m}^3$  increase in CO at different lag days in 75 Chinese cities stratified by geographical region.



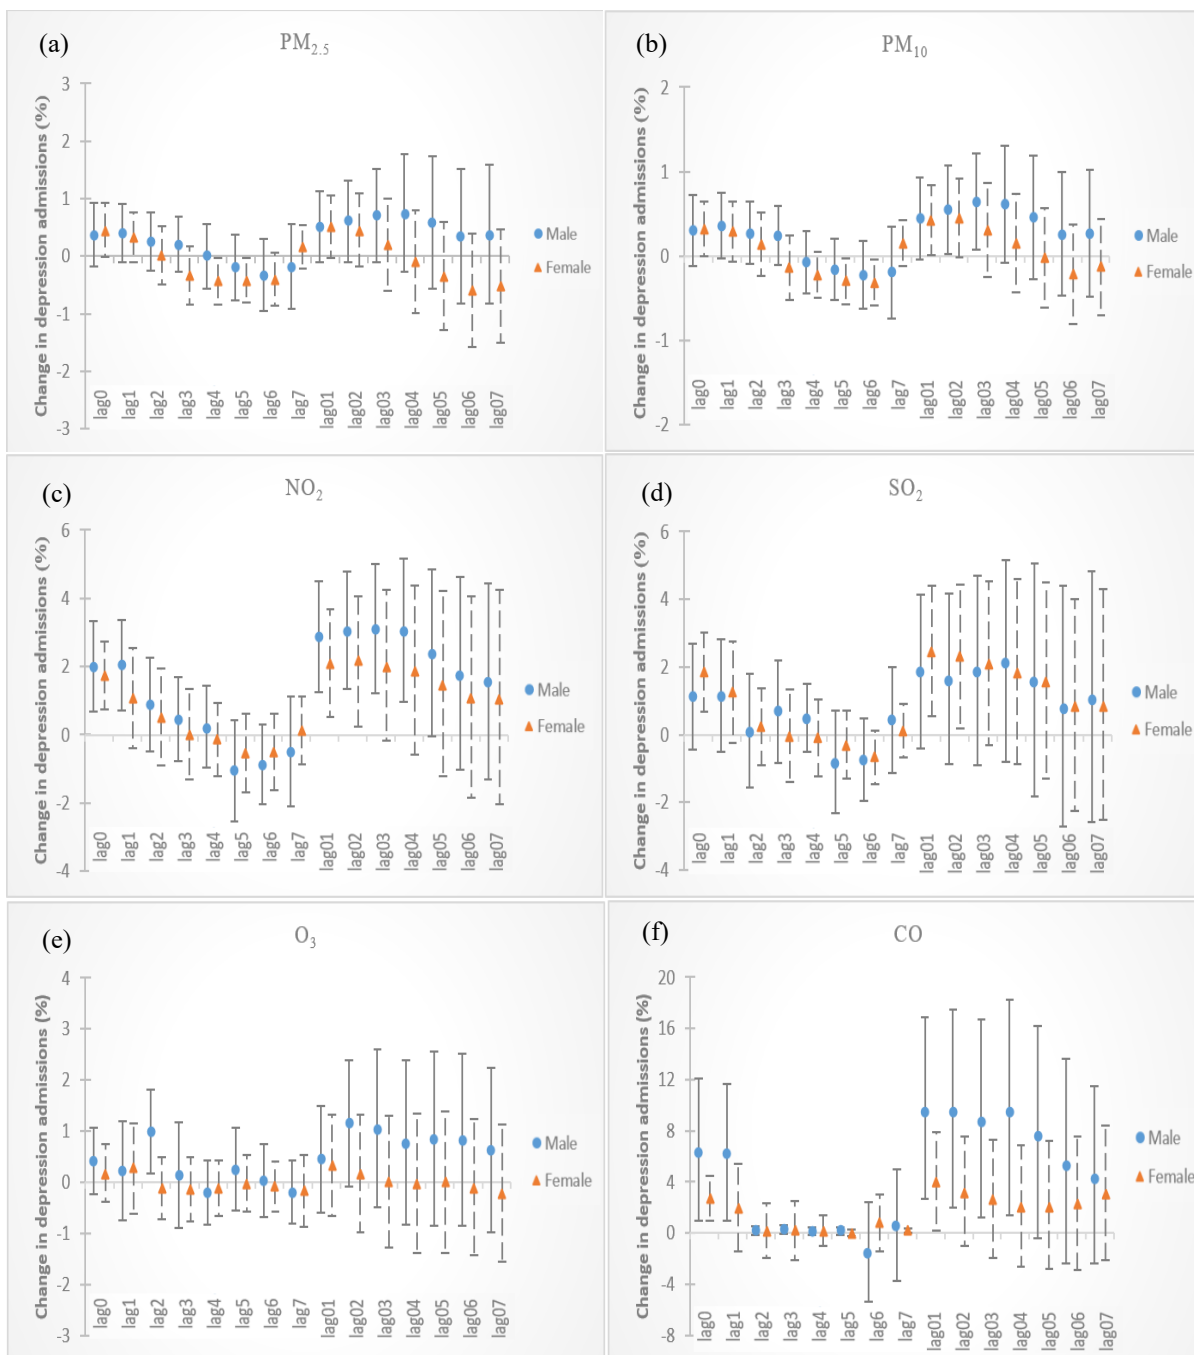

**FIGURE S10.** Overall percent changes in daily hospital admissions for depression per 10 $\mu\text{g}/\text{m}^3$  increases in PM<sub>2.5</sub>, PM<sub>10</sub>, NO<sub>2</sub>, SO<sub>2</sub>, O<sub>3</sub> and 1mg/m<sup>3</sup> increase in CO at different lag days in 75 Chinese cities stratified by sex.



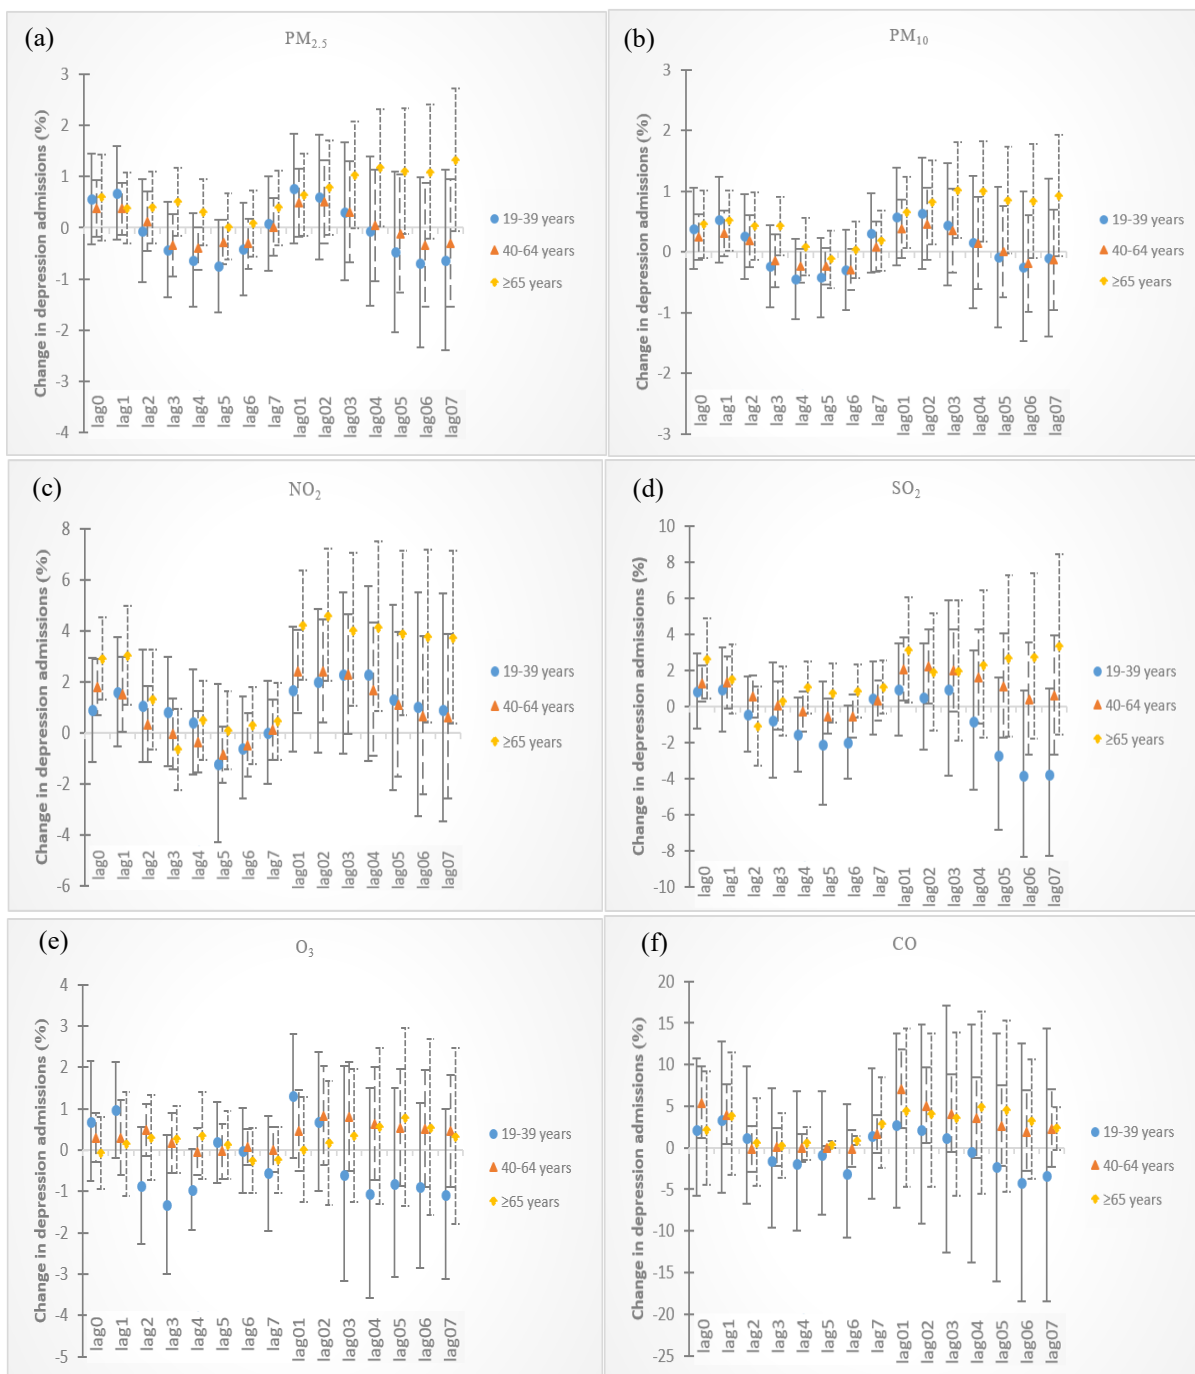

**FIGURE S11.** Overall percent changes in daily hospital admissions for depression per  $10\mu\text{g}/\text{m}^3$  increases in  $\text{PM}_{2.5}$ ,  $\text{PM}_{10}$ ,  $\text{NO}_2$ ,  $\text{SO}_2$ ,  $\text{O}_3$  and  $1\text{mg}/\text{m}^3$  increase in CO at different lag days in 75 Chinese cities stratified by age.

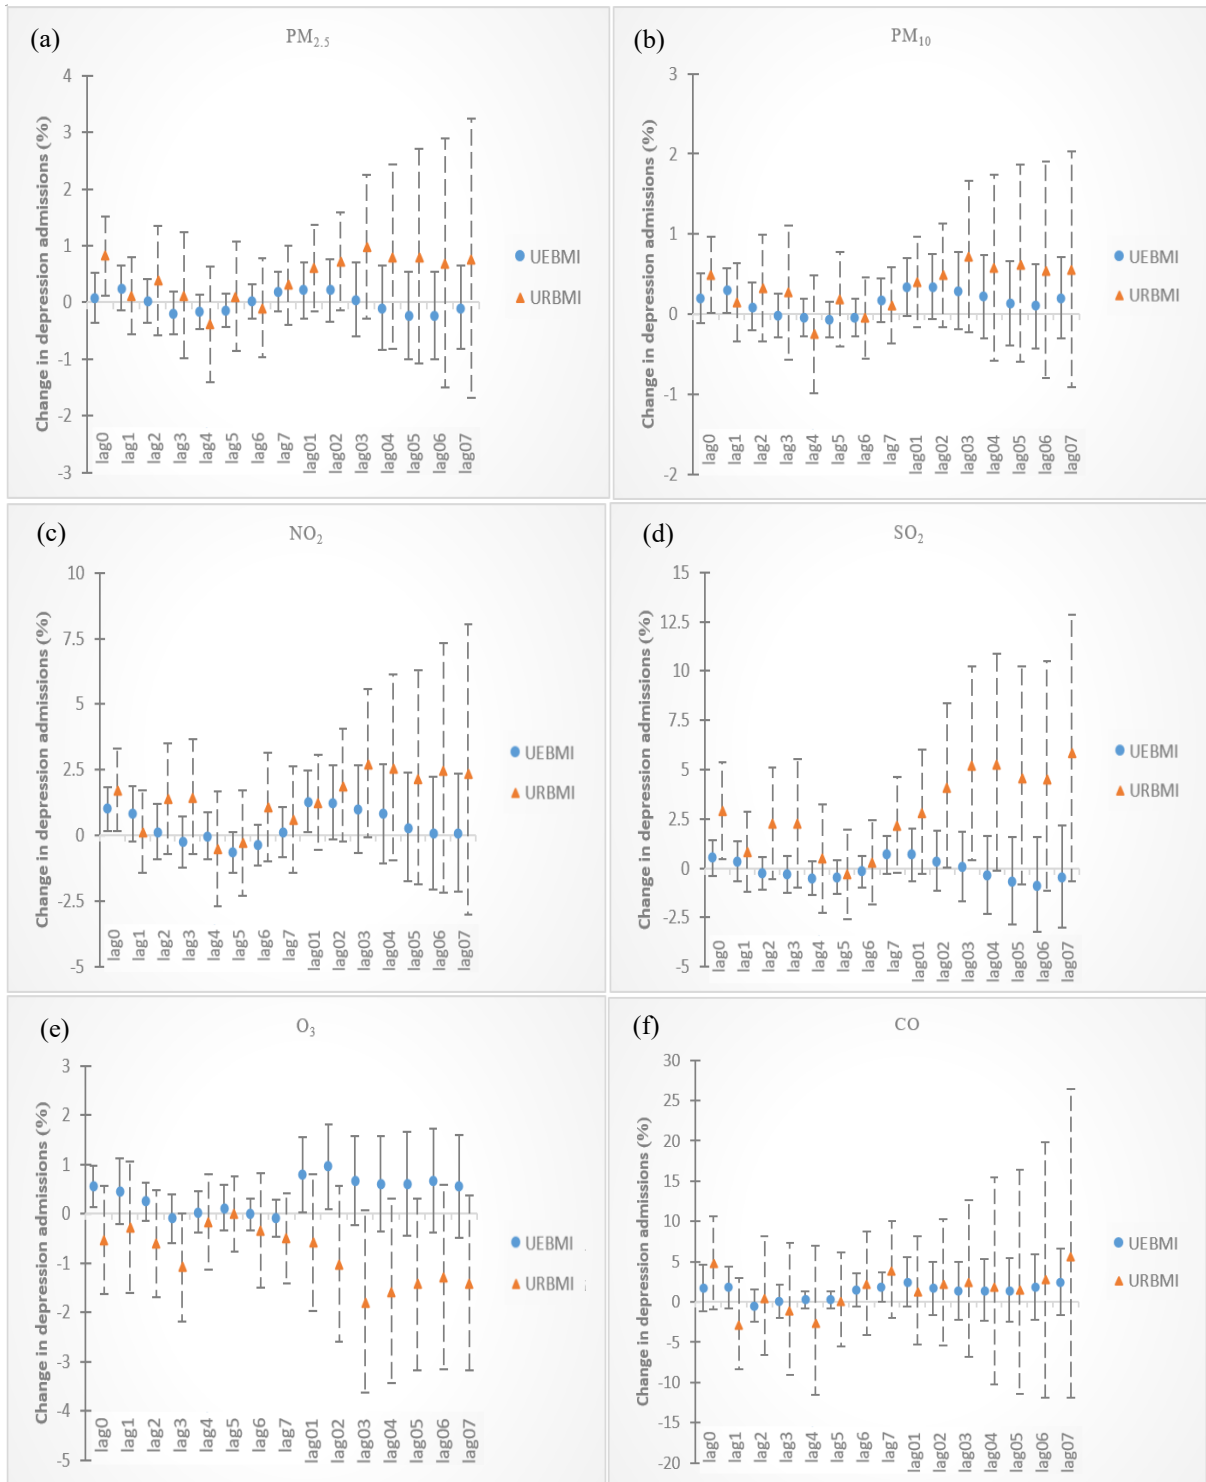

**FIGURE S12.** Overall percent changes in daily hospital admissions for depression per  $10\mu\text{g}/\text{m}^3$  increases in  $\text{PM}_{2.5}$ ,  $\text{PM}_{10}$ ,  $\text{NO}_2$ ,  $\text{SO}_2$ ,  $\text{O}_3$  and  $1\text{mg}/\text{m}^3$  increase in CO at different lag days in 75 Chinese cities stratified by insurance type.
